# Supplementary material for: Secondhand tobacco smoke exposure among children under 5 years old: questionnaires versus cotinine biomarkers: a cohort study
Source: PubMed Central journal article supplement — BMJ Open. 2021 Jun 28;11(6):e044829. doi: 10.1136/bmjopen-2020-044829 (PMC8240561; doi:10.1136/bmjopen-2020-044829), 2021-06-28
Supplement: bmjopen-2020-044829supp001.pdf [file bmjopen-2020-044829supp001.pdf]

**Supplementary Table 1.** Baseline sociodemographic characteristics of HOME Study women at pregnancy and at 12, 24, 36 and 48 months after delivery accompanied with their children sex.

|                                       | Pregnancy   | 12 months  | 24 months  | 36 months  | 48 months  |
|---------------------------------------|-------------|------------|------------|------------|------------|
| <b>n</b>                              | 384(100.0)  | 336 (87.5) | 280 (72.9) | 258 (67.2) | 187 (48.7) |
| <b>Age group (years)<sup>a</sup></b>  |             |            |            |            |            |
| under 25                              | 93 (24.2)   | 67 (19.9)  | 50 (17.9)  | 45 (17.4)  | 36 (19.3)  |
| 25-29                                 | 109 (28.4)  | 97 (28.9)  | 79 (28.2)  | 80 (31.0)  | 59 (31.6)  |
| 30-34                                 | 120 (31.3)  | 115 (34.2) | 106 (37.9) | 90 (34.9)  | 61 (32.6)  |
| 35 and over                           | 62 (16.2)   | 57 (17.0)  | 45 (16.1)  | 43 (16.7)  | 31 (16.6)  |
| <b>Race/ethnicity<sup>a</sup></b>     |             |            |            |            |            |
| Non-Hispanic white                    | 238 (62.0)  | 226 (67.3) | 197 (70.4) | 183 (70.9) | 128 (68.5) |
| Non-Hispanic black                    | 121 (31.5)  | 89 (26.5)  | 66 (23.6)  | 58 (22.5)  | 47 (25.1)  |
| Other                                 | 25 (6.5)    | 21 (6.3)   | 17 (6.1)   | 17 (6.6)   | 12 (6.4)   |
| <b>Level of education<sup>a</sup></b> |             |            |            |            |            |
| Less than high school/high school     | 95 (24.7)   | 67 (19.9)  | 50 (17.9)  | 49 (19.0)  | 34 (18.2)  |
| Some college                          | 98 (25.5)   | 85 (25.3)  | 66 (23.6)  | 60 (23.3)  | 49 (26.2)  |
| College                               | 191 (49.7)  | 184 (54.8) | 164 (58.6) | 149 (57.8) | 104 (55.6) |
| <b>Employment<sup>d</sup></b>         |             |            |            |            |            |
| Not working                           | 74 (19.3)   | 74 (22.0)  |            |            |            |
| Working                               | 310 (80.7)  | 262 (78.0) |            |            |            |
| <b>Living with partner</b>            |             |            |            |            |            |
| Yes                                   | 300 (78.1)  | 273 (81.3) | 234 (83.6) | 218 (84.5) | 155 (82.9) |
| No                                    | 84 (21.9)   | 63 (18.8)  | 46 (16.4)  | 40 (15.5)  | 32 (17.1)  |
| <b>Income (\$/year)</b>               |             |            |            |            |            |
| Until 25,000                          | 102 (26.6)  | 69 (20.7)  | 48 (17.3)  | 47 (18.4)  | 37 (19.9)  |
| Over 25,000                           | 282 (73.4)  | 264 (79.3) | 229 (82.7) | 209 (81.6) | 149 (80.1) |
| <b>Health insurance<sup>d</sup></b>   |             |            |            |            |            |
| Public                                | 102 (26.6)  | 87 (25.9)  | 59 (21.1)  | 57 (22.1)  |            |
| Private                               | 272 (70.8)  | 245 (72.9) | 216 (77.1) | 198 (76.7) |            |
| None                                  | 10 (2.6)    | 4 (1.2)    | 5 (1.8)    | 3 (1.2)    |            |
| <b>Child<sup>c</sup></b>              |             |            |            |            |            |
| n                                     | 384 (100.0) | 336 (87.5) | 280 (72.9) | 258 (67.2) | 187 (48.7) |
| Male                                  | 178 (46.4)  | 151 (44.9) | 129 (46.1) | 119 (46.1) | 78 (41.7)  |
| Female                                | 206 (53.7)  | 185 (55.1) | 151 (53.9) | 139 (53.9) | 109 (58.3) |
| <b>Child<sup>d</sup></b>              |             |            |            |            |            |
| n                                     | 280 (100.0) | 270 (96.4) | 197 (70.4) | 196 (70.0) | 150 (53.6) |
| Male                                  | 130 (46.4)  | 122 (45.2) | 90 (45.7)  | 86 (43.9)  | 65 (43.3)  |
| Female                                | 150 (53.6)  | 148 (54.8) | 107 (54.3) | 110 (56.1) | 85 (56.7)  |

n, number of observations.

<sup>a</sup> Unchanged sociodemographic characteristics obtained at baseline and further adjusted to the distribution of mothers remaining at each time period of the HOME Study.<sup>b</sup> Data not available at all the time periods.<sup>c</sup> Child with maternal self-reported data.<sup>d</sup> Child with both maternal self-reported data and serum cotinine measures.

**Supplementary Table 2.** Prevalence of maternal tobacco consumption and exposure to SHS during pregnancy and at 12, 24, 36 and 48 months among participants with maternal-reported data and among participants with both maternal-reported data and cotinine measures.

|                                                                        | <b>Pregnancy</b> | <b>12 months</b> | <b>24 months</b> | <b>36 months</b> | <b>48 months</b> |
|------------------------------------------------------------------------|------------------|------------------|------------------|------------------|------------------|
| <b>Participants with self-reported data</b>                            |                  |                  |                  |                  |                  |
| n                                                                      | 384              | 336              | 280              | 258              | 187              |
| Mother active smoker                                                   | 48 (12.5%)       | 35 (10.4%)       | 26 (9.3%)        | 23 (8.9%)        | 23 (12.3%)       |
| Mother/Child Exposed to SHS                                            | 59 (15.4%)       | 55 (16.4%)       | 50 (17.9%)       | 41 (15.9%)       | 36 (19.3%)       |
| Mother/Child Unexposed to SHS                                          | 277 (72.1%)      | 246 (73.2%)      | 204 (72.9%)      | 194 (75.2%)      | 128 (68.5%)      |
| <b>Participants with both self-reported data and cotinine measures</b> |                  |                  |                  |                  |                  |
| n                                                                      | 280              | 270              | 197              | 196              | 150              |
| Mother active smoker                                                   | 34 (12.1%)       | 25 (9.3%)        | 17 (8.6%)        | 22 (11.2%)       | 21 (14.0%)       |
| Mother/Child Exposed to SHS                                            | 41 (14.6%)       | 47 (17.4%)       | 37 (18.8%)       | 29 (14.8%)       | 26 (17.3%)       |
| Mother/Child Unexposed to SHS                                          | 205 (73.2%)      | 198 (73.3%)      | 143 (72.6%)      | 145 (74.0%)      | 103 (68.7%)      |

SHS, secondhand tobacco smoke; n, number of observations.

**Supplementary Figure 1.** Receiver operating characteristic curves, empirical and binormal, for child's serum cotinine concentrations and maternal-reported SHS exposure at each age.

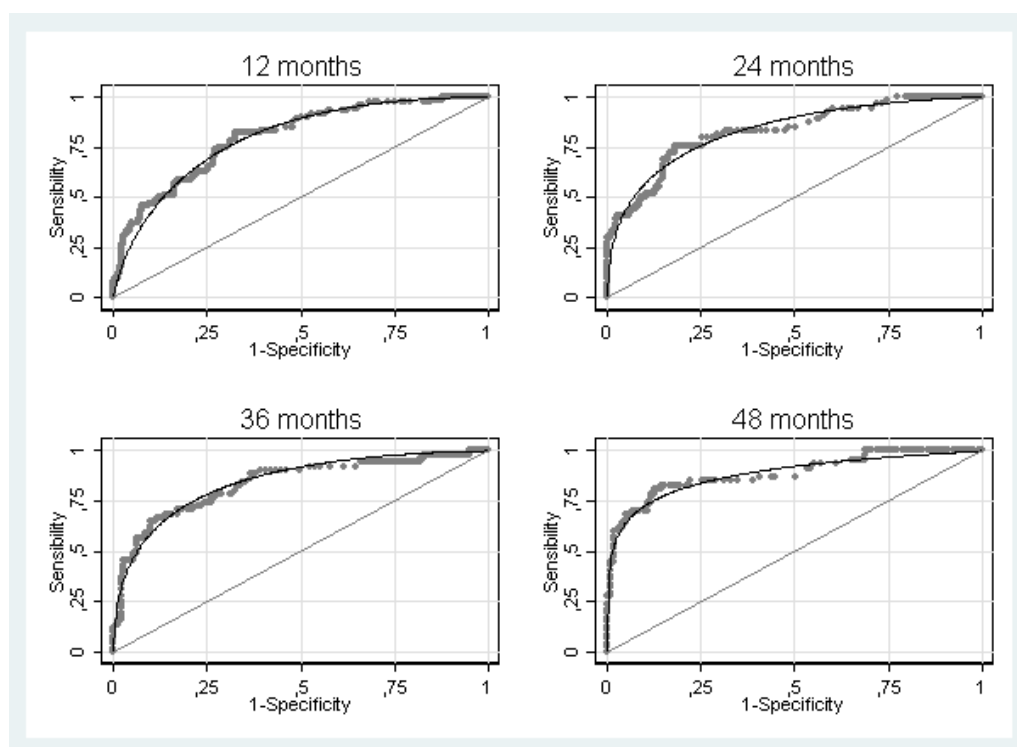

**Supplementary Figure 1.** Sensitivity is represented on the y-axis and the complementary of specificity (1-specificity), which is the ratio of false positives, on the x-axis. The area under receiver operating characteristic curves was above 0.80 at all times. This value reflects the excellent diagnostic ability of the serum cotinine to classify SHS exposure among the participating children.
